# Supplementary material for: Targeted Disruption of the MORG1 Gene in Mice Causes Embryonic Resorption in Early Phase of Development
Source: MDPI journal article supplement (doi:10.3390/biom13071037), 2023-06-24
Supplement: s1 [file s1]

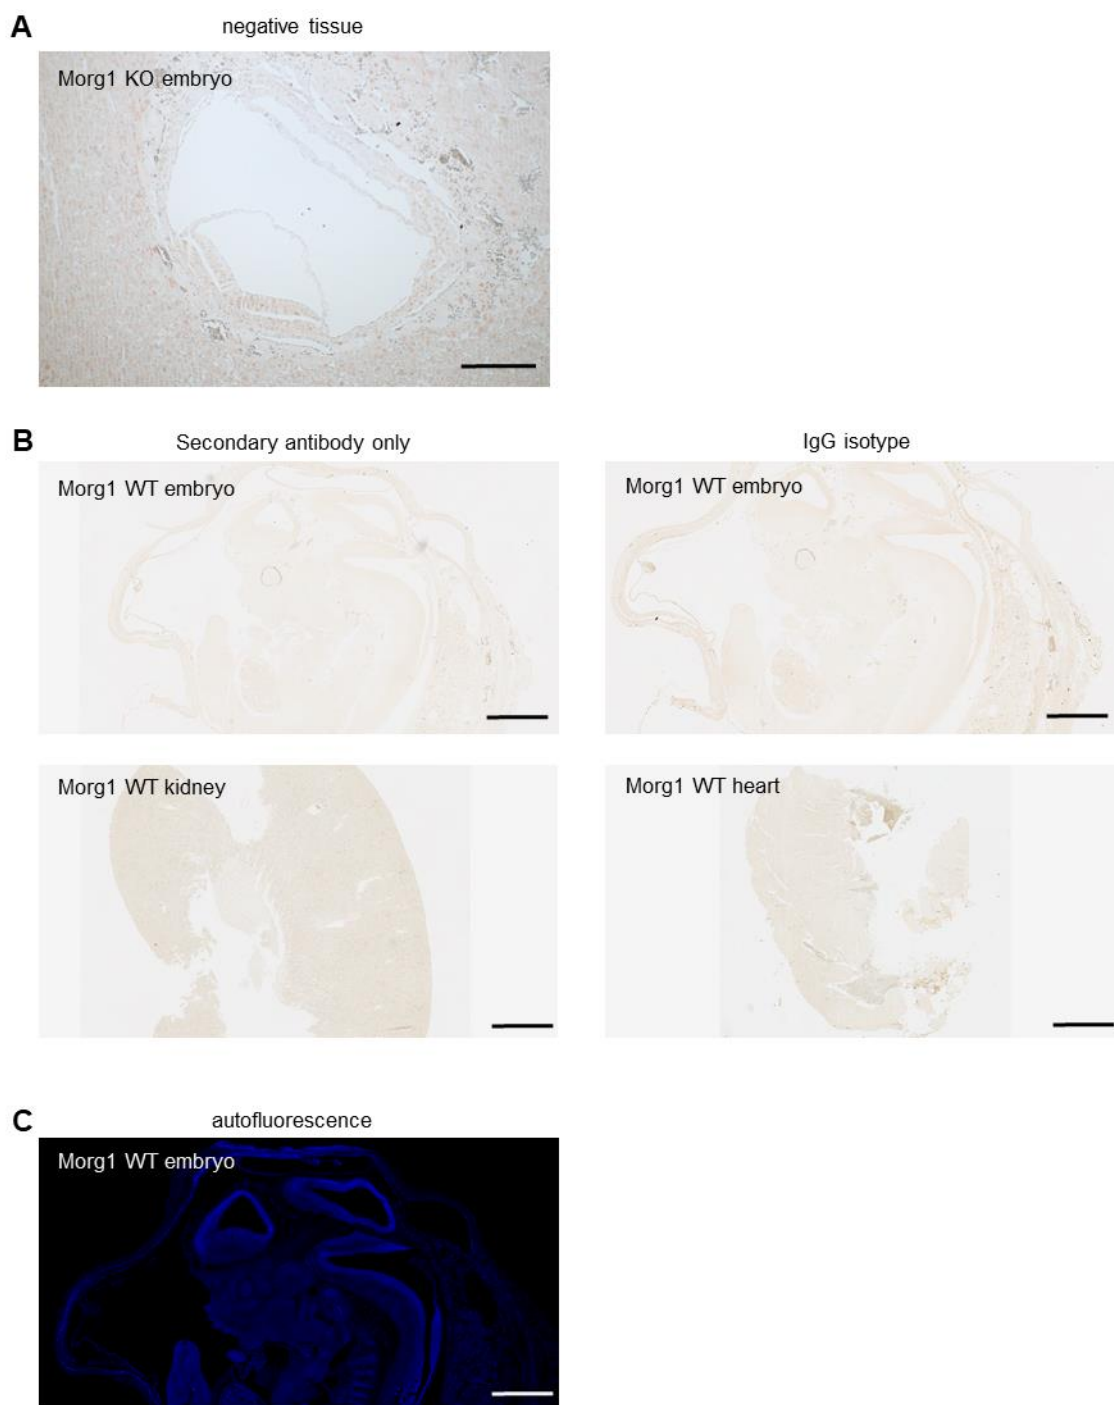

**Figure S1.** Control stains to assess the specificity of the antibody MORG1. **(A)** Representative image of “negative tissue” control on MORG1 knockout embryos. **(B)** Representative images of “secondary antibody only” and “isotype” control (IgG) on wildtype embryos and adult tissues. **(C)** Autofluorescence control of the mIFs on wildtype embryos. Scale bars = 500  $\mu$ m.

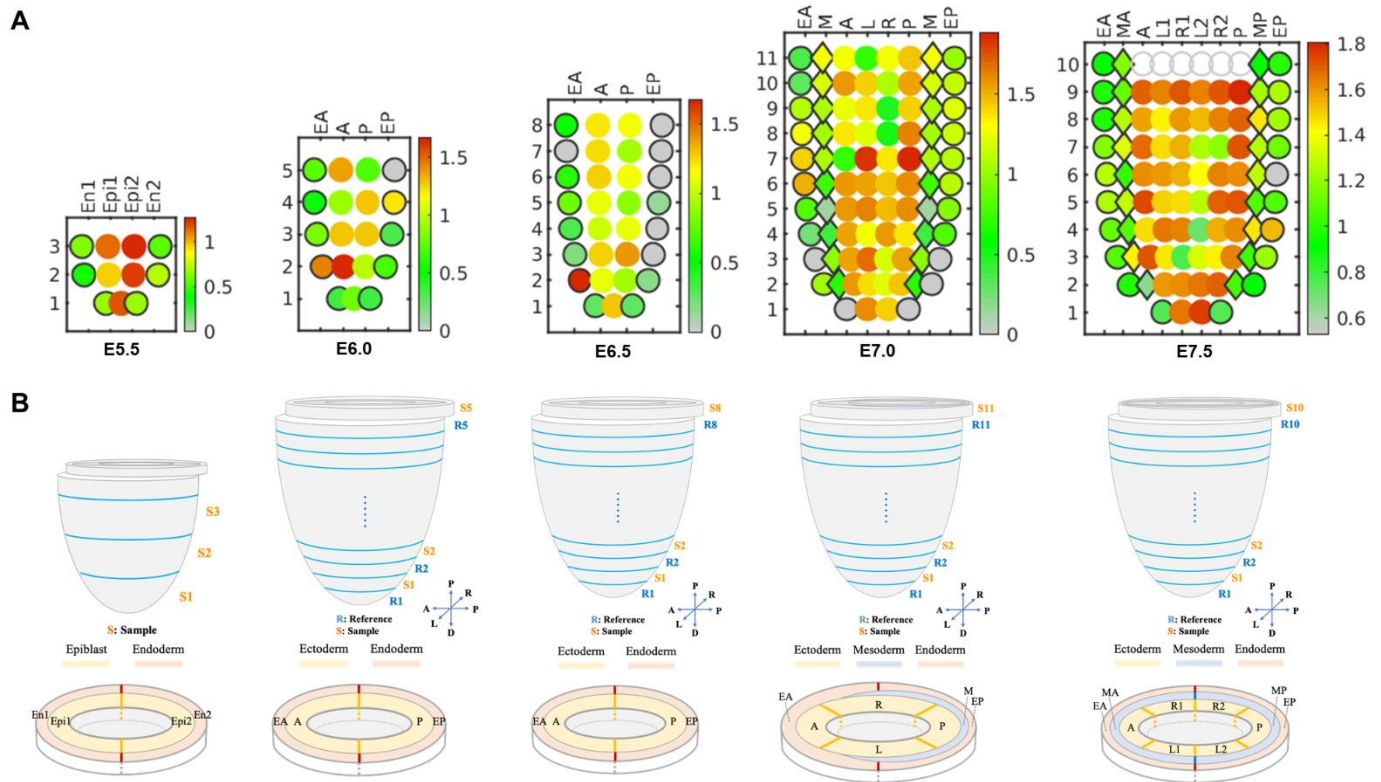

**Figure S2.** Spatiotemporal MORG1 transcription pattern of post-implantation mouse embryos generated by Geo-seq as annotated on the eGastrulation repository (<http://egastrulation.sibcb.ac.cn/aHome/>). **(A)** Corn plot representations of the spatial pattern of *Wdr83* gene expression at indicated embryonic stages. Each dot in the plot represents the cell sample at the specific positional address, gene expression is color-coded as computed from the transcript counts in the RNA-seq dataset. Solid circles, epiblast–ectoderm; black outlined rhombus, mesoderm; black outlined circles, endoderm; grey hollow circles, no sample. **(B)** Schematic illustration of the Geo-seq procedure. A, anterior; P, posterior; L, left lateral; R, right lateral; L1, anterior left lateral; R1, anterior right lateral; L2, posterior left lateral; R2, posterior right lateral; Epi1 and Epi2, divided epiblast; M, whole mesoderm; MA, anterior mesoderm; MP, posterior mesoderm; En1 and En2, divided endoderm; EA, anterior endoderm; EP, posterior endoderm. For more details see references [45–47].
